# Supplementary material for: Alloyed triple half-Heuslers: a route toward high-performance thermoelectrics with intrinsically low lattice thermal conductivity
Source: Royal Society of Chemistry journal article supplement (doi:10.1039/d3ta01428b), 2023-01-01
Supplement: d3ta01428b1.pdf [file d3ta01428b1.pdf]

## Electronic Supplementary Information (ESI)

### **Alloyed triple half-Heusler: a route toward high performance thermoelectrics with intrinsically low lattice thermal conductivity**

Peng-Fei Luo,<sup>‡a</sup> Shengnan Dai,<sup>‡b</sup> Yuting Zhang,<sup>a</sup> Xin Liu,<sup>a</sup> Zhili Li,<sup>a</sup> Jiye Zhang,<sup>a</sup> Jiong  
Yang,<sup>\*b</sup> Jun Luo,<sup>\*ab</sup>

<sup>a</sup>*School of Materials Science and Engineering, Shanghai University, Shanghai, 200444, PR China*

<sup>b</sup>*Materials Genome Institute, Shanghai University, Shanghai, 200444, PR China*

‡ These authors contributed equally to this work.

\*Corresponding authors: Jun Luo; Jiong Yang

E-mail: [junluo@shu.edu.cn](mailto:junluo@shu.edu.cn) (J. Luo); [jiongy@t.shu.edu.cn](mailto:jiongy@t.shu.edu.cn) (J. Yang)

## Supplementary section 1

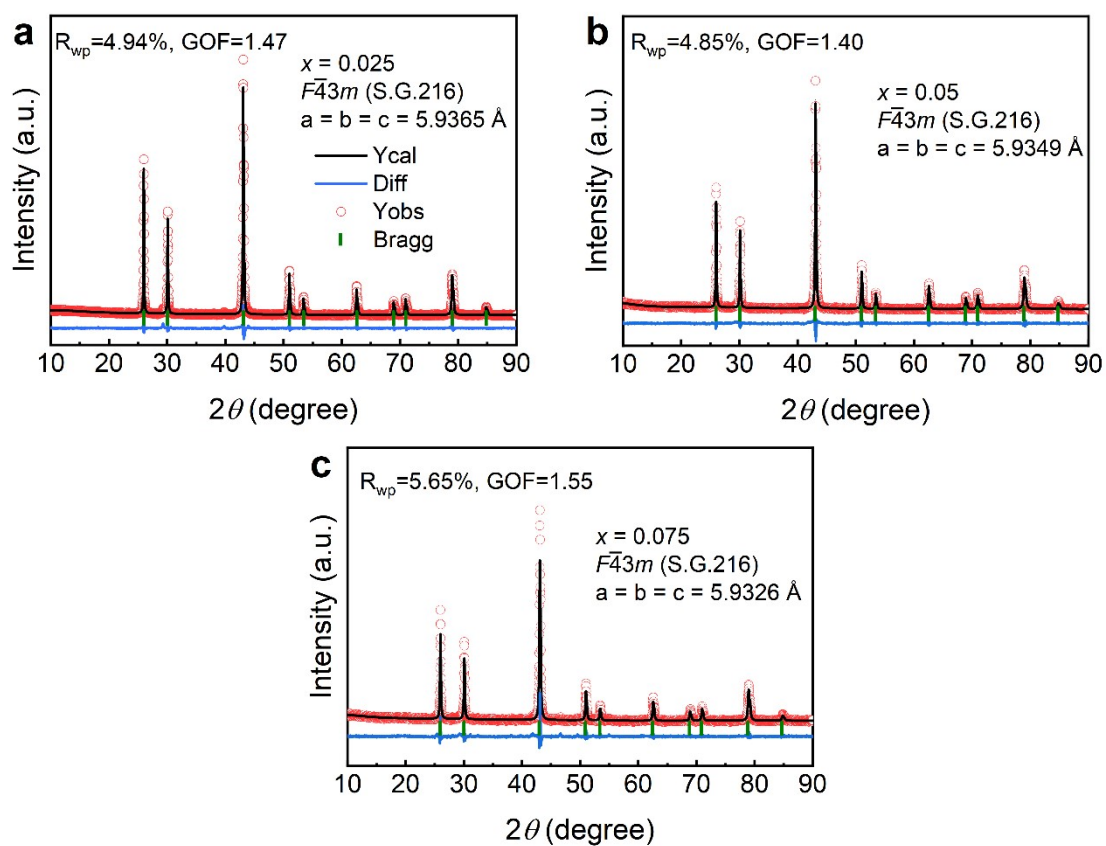

**Fig. S1** (a-c) XRD patterns of the Ti(Fe<sub>0.5+x</sub>Co<sub>0.25</sub>Cu<sub>0.25-x</sub>)Sb ( $x = 0.025, 0.05, \text{ and } 0.075$ ) samples together with their Rietveld refinement results.

## Supplementary section 2

### 1.1 Single parabolic band model

Assuming the carrier conduction occurs within a single parabolic band (SPB),<sup>1</sup> we can obtain the following equations according to the Boltzmann transport theory:

The Seebeck coefficient,

$$S(\eta) = \pm \frac{k_B}{e} \left[ \frac{(r + 5/2)F_{(r+3/2)}(\eta)}{(r + 3/2)F_{(r+1/2)}(\eta)} - \eta \right] \quad (1)$$

The Hall carrier concentration,

$$n_H = \frac{(2m^* k_B T)^2 (r + 3/2)F_{(r+1/2)}^2(\eta)}{3\pi^2 \hbar^3 (2r + 3/2)F_{(2r+1/2)}(\eta)} \quad (2)$$

The Lorentz number,

$$L = \left( \frac{k_B}{e} \right)^2 \left\{ \frac{(r + 7/2)F_{(r+5/2)}(\eta)}{(r + 3/2)F_{(r+3/2)}(\eta)} - \left[ \frac{(r + 5/2)F_{(r+3/2)}(\eta)}{(r + 3/2)F_{(r+1/2)}(\eta)} \right]^2 \right\} \quad (3)$$

The Fermi integral,

$$F_j(\eta) = \int_0^\infty \frac{\xi^j d\xi}{1 + \exp(\xi - \eta)} \quad (4)$$

Where  $\eta = E_F/k_B T$  is the reduced Fermi level,  $\xi$  the reduced carrier energy,  $m^*$  the density of states (DOS) effective mass,  $\hbar$  the reduced Planck constant, and the scattering factor  $r$  relates to the energy dependence of the carrier relaxation time  $\tau$  via  $\tau = \tau_0 \varepsilon^r$ . When the charge carriers are scattered by acoustic phonon, the parameter  $r$  is equal to - 1/2.

The drift mobility for acoustic phonon scattering can be expressed as<sup>2</sup>:

$$\mu_{ph} = \frac{\sqrt{2} e \pi \hbar^4 v_L^2 \rho F_0(\eta)}{3(k_B T)^{3/2} \Xi^2 (m_b^*)^{5/2} F_{1/2}(\eta)} \quad (5)$$

where  $v_L$  is the velocity of longitudinal waves,  $\rho$  the sample density,  $\mathcal{E}$  the deformation potential, and  $m_b^*$  the band effective mass.

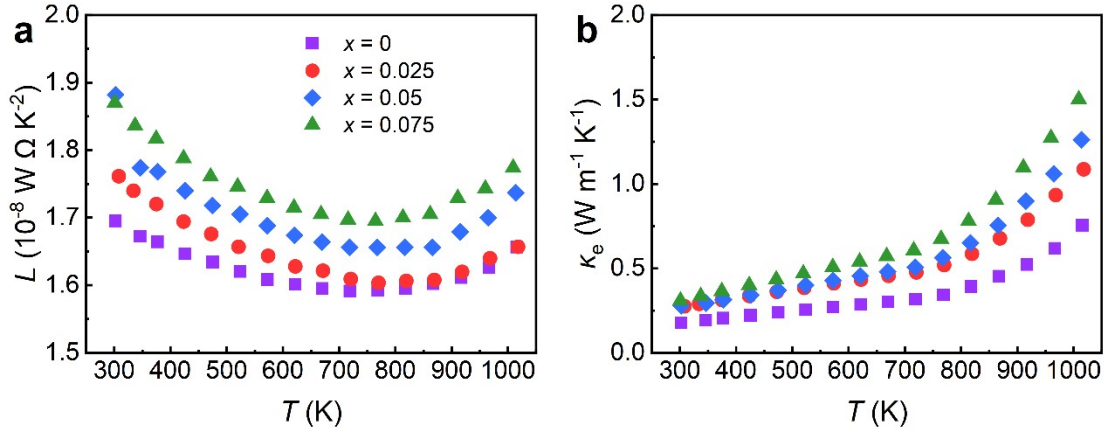

**Fig. S2** Temperature dependence of (a) calculated Lorentz number ( $L$ ) and (b) electronic thermal conductivity ( $\kappa_e$ ) for Ti(Fe<sub>0.5+x</sub>Co<sub>0.25</sub>Cu<sub>0.25-x</sub>)Sb ( $x = 0, 0.025, 0.05,$  and  $0.075$ ) samples.

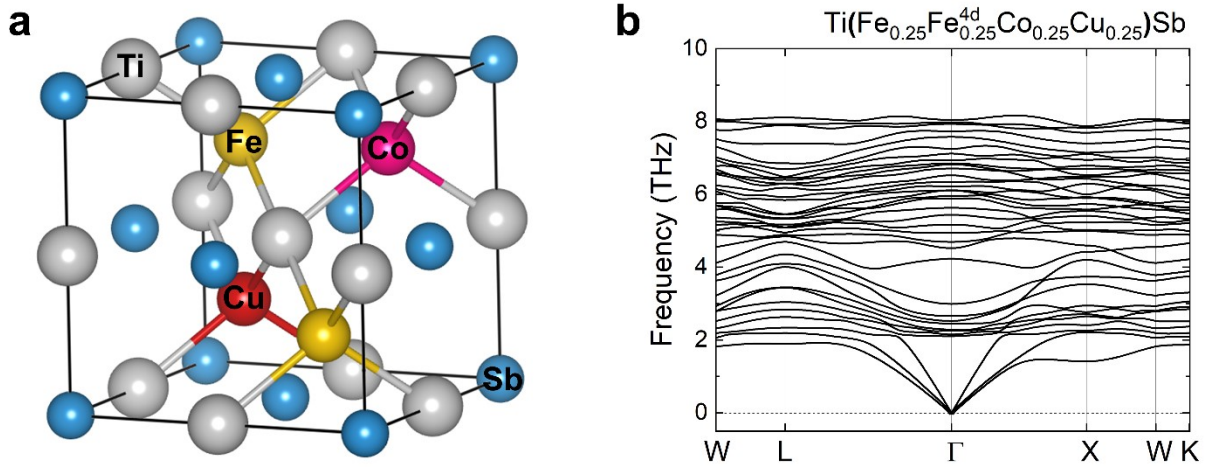

**Fig. S3** (a) The crystal structure of Ti(Fe<sub>0.25</sub>Fe<sub>0.25</sub><sup>4d</sup>Co<sub>0.25</sub>Cu<sub>0.25</sub>)Sb. (b) The phonon dispersion of Ti(Fe<sub>0.25</sub>Fe<sub>0.25</sub><sup>4d</sup>Co<sub>0.25</sub>Cu<sub>0.25</sub>)Sb.

## 1.2 Minimum lattice conductivity of Ti(Fe<sub>0.5+x</sub>Co<sub>0.25</sub>Ni<sub>0.25-x</sub>)Sb samples

According to the Cahill model,<sup>3</sup> the minimum lattice thermal conductivity can be written as the following formula:

$$\kappa_{min} = \left(\frac{\pi}{6}\right)^{1/3} k_B n^{2/3} \sum_i v_i \left(\frac{T}{\theta_i}\right)^2 \int_0^{\theta_i/T} \frac{x^3 e^x}{(e^x - 1)^2} dx \quad (6)$$

Here,  $n$ ,  $v_i$  and  $\theta_i$  are the number density of atoms, the acoustic phonon velocity and the Debye temperature for each acoustic mode, respectively. Parameter  $\theta_i$  can be obtained by the relationship  $\theta_i = v_i (\hbar/k_B)(6\pi^2 n)^{1/3}$ .

## 1.3 Elastic properties of Ti(Fe<sub>0.5+x</sub>Co<sub>0.25</sub>Ni<sub>0.25-x</sub>)Sb samples

Average sound velocity  $v_s$  can be extracted from:

$$v_s = \left[ \frac{1}{3} \left( \frac{1}{v_l^3} + \frac{2}{v_t^3} \right) \right]^{-\frac{1}{3}} \quad (7)$$

where  $v_l$  and  $v_t$  are the longitudinal and transverse sound velocity respectively, which have been obtained as described in the experimental details section.

Debye temperature  $\theta_D$  is calculated by:

$$\theta_D = \frac{h}{k_B} \left[ \frac{3N_A \rho}{4\pi M} \right]^{\frac{1}{3}} v_s \quad (8)$$

where  $h$  is the Planck constant,  $k_B$  is the Boltzmann constant,  $N$  represents the number of atoms in the molecule,  $N_A$  is the Avogadro constant,  $\rho$  is the mass density,  $M$  represents the molecular weight of the sample, respectively.

The Poisson ratio ( $\nu_p$ ), shear modulus ( $G$ ), bulk modulus ( $B$ ) and Young's modulus ( $E$ ) can be derived by the relationship as:

$$\nu_p = \frac{v_l^2 - 2v_t^2}{2(v_l^2 + v_t^2)} \quad (9)$$

$$v_p = \frac{v_l^2 - 2v_t^2}{2(v_l^2 - v_t^2)} \quad (10)$$

$$B = \frac{\rho(3v_l^2 - 4v_t^2)}{3} \quad (11)$$

$$E = \frac{\rho v_t^2(3v_l^2 - 4v_t^2)}{(v_l^2 - v_t^2)} \quad (12)$$

**Table S1.** Room-temperature transverse sound velocities ( $v_t$ ), longitudinal sound velocities ( $v_l$ ), average sound velocities ( $v_s$ ), Poisson ratio ( $\nu_p$ ), shear modulus ( $G$ ), bulk modulus ( $B$ ), Young's moduli ( $E$ ), and mass densities ( $\rho$ ) for Ti(Fe<sub>0.5+x</sub>Co<sub>0.25</sub>Ni<sub>0.25-x</sub>)Sb ( $x= 0, 0.025, 0.05, 0.075$ ) samples.

| Samples   | $v_t$<br>(m·s <sup>-1</sup> ) | $v_l$<br>(m·s <sup>-1</sup> ) | $v_s$<br>(m·s <sup>-1</sup> ) | Poisson<br>ratio | Shear<br>modulus<br>(GPa) | Bulk<br>modulus<br>(GPa) | Young's<br>modulus<br>(GPa) | $\rho$<br>(g·cm <sup>-3</sup> ) |
|-----------|-------------------------------|-------------------------------|-------------------------------|------------------|---------------------------|--------------------------|-----------------------------|---------------------------------|
| $x=0.000$ | 3087                          | 5712                          | 3445                          | 0.294            | 69                        | 144                      | 178                         | 7.21                            |
| $x=0.025$ | 3059                          | 5367                          | 3400                          | 0.259            | 67                        | 178                      | 170                         | 7.21                            |
| $x=0.050$ | 3004                          | 5328                          | 3342                          | 0.267            | 66                        | 120                      | 167                         | 7.32                            |
| $x=0.075$ | 2974                          | 5322                          | 3310                          | 0.273            | 64                        | 119                      | 162                         | 7.21                            |

## 1.4 Low-temperature heat capacity fitting

**Table S2.** Parameters used to fit the low temperature heat capacity ( $C_p$ ) of  $\text{Ti}(\text{Fe}_{0.5}\text{Co}_{0.25}\text{Cu}_{0.25})\text{Sb}$  by using one Debye and one Einstein mode.

| Fitting parameters                                       | Values    |
|----------------------------------------------------------|-----------|
| $\delta$ ( $10^{-3} \text{ J mol}^{-1} \text{ K}^{-2}$ ) | 1.4       |
| $\beta$ ( $10^{-5} \text{ J mol}^{-1} \text{ K}^{-4}$ )  | 6.26      |
| $A$ ( $\text{J mol}^{-1} \text{ K}^{-1}$ )               | 10.17     |
| $\Theta_E$ (K)                                           | 146       |
| $\omega/\nu$ (THz)                                       | 19.2/3.06 |

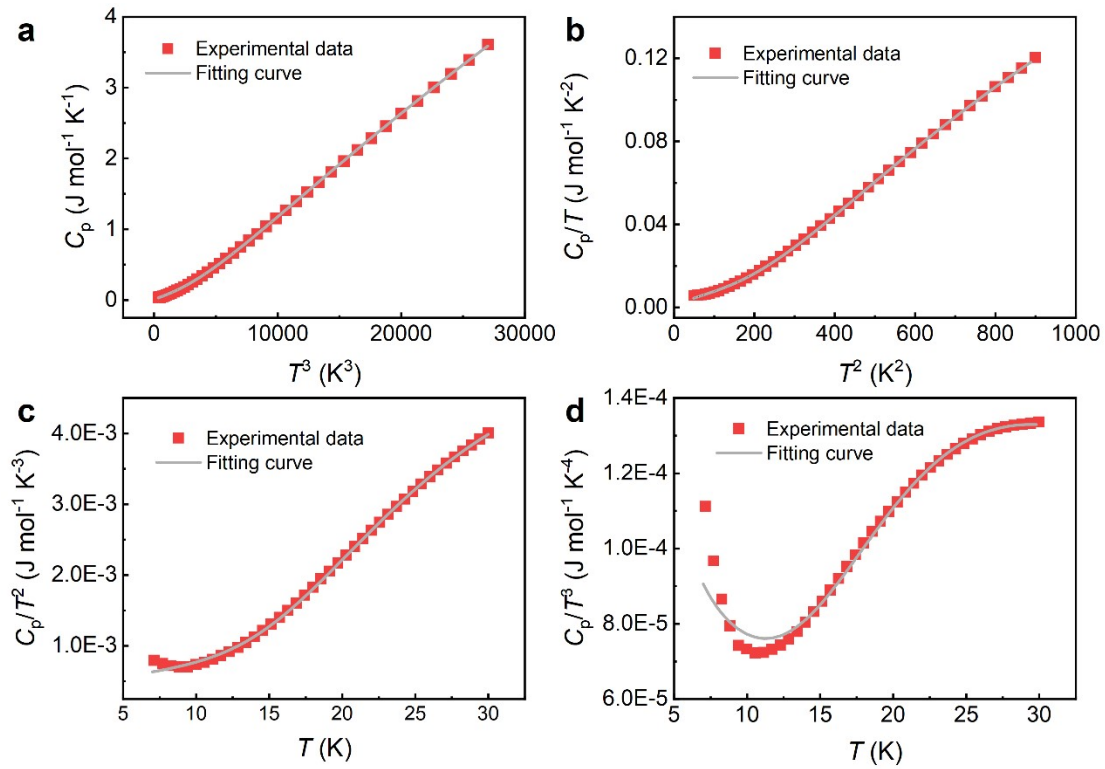

**Fig. S4** Heat capacity fitting for the  $\text{Ti}(\text{Fe}_{0.5}\text{Co}_{0.25}\text{Cu}_{0.25})\text{Sb}$  sample from 7 K to 30 K. (a)-(d)  $C_p$  versus  $T^3$ ,  $C_p/T$  versus  $T^2$ ,  $C_p/T^2$  versus  $T$ , and  $C_p/T^3$  versus  $T$  for  $\text{Ti}(\text{Fe}_{0.5}\text{Co}_{0.25}\text{Cu}_{0.25})\text{Sb}$  by using one Debye mode plus one Einstein mode from 7 K to 30 K.

## 1.5 Lattice thermal conductivity modeling

We modeled the lattice thermal conductivity based on the Debye-Callaway approximation.<sup>4, 5</sup>

In this model, the lattice thermal conductivity can be written as

$$\kappa_L = \frac{k_B}{2\pi^2 v_s} \left( \frac{k_B}{\hbar} \right)^3 T^3 \int_0^{\theta_D/T} \tau_C \frac{x^4 e^x}{(e^x - 1)^2} dx \quad (13)$$

The phonon relaxation rate  $\tau_C^{-1}$  can be determined by combining various scattering processes:

$$\tau_C^{-1} = \tau_B^{-1} + \tau_{PD}^{-1} + \tau_U^{-1} + \tau_{EP}^{-1} \quad (14)$$

where  $\tau_B$ ,  $\tau_{PD}$ ,  $\tau_U$ , and  $\tau_{EP}$  are relaxation times for boundary scattering, point defect scattering, Umklapp process, and electron-phonon (*EP*) scattering, respectively. The boundary scattering rate is temperature and frequency independent and can be represented by

$$\tau_B^{-1} = \frac{v_s}{L} \quad (15)$$

where  $L$  is the average grain size. The point defect scattering rate is frequency dependent, having a strong frequency dependence

$$\tau_{PD}^{-1} = A\omega^4 \quad (16)$$

where  $A$  is a material dependent point defect prefactor. Umklapp processes are characterized by a relaxation rate proposed by Glassbrenner and Slack (GS)<sup>6</sup> with

$$\tau_U^{-1} = B\omega^2 T e^{-\theta_D/3T} \quad (17)$$

where  $B$  is the Umklapp prefactor. The electron-phonon scattering rate is frequency dependent, having a frequency dependence

$$\tau_{EP}^{-1} = C\omega^2 \quad (18)$$

where  $C$  is the electron-phonon scattering prefactor.





**Table S3.** Fitting parameters for the lattice thermal conductivity of Ti(Fe<sub>0.5</sub>Co<sub>0.25</sub>Cu<sub>0.25</sub>)Sb.

| <b>Fitting parameters</b>           | <b>Values</b> |
|-------------------------------------|---------------|
| $L$ ( $\mu\text{m}$ )               | 0.66          |
| $A$ ( $10^{-42} \text{ s}^{-3}$ )   | 8.45          |
| $B$ ( $10^{-18} \text{ s K}^{-1}$ ) | 1.21          |
| $C$ ( $10^{-18} \text{ s}$ )        | 1.15          |
| $v_s$ ( $\text{m s}^{-1}$ )         | 3445          |
| $\theta_D$ (K)                      | 395           |

### Supplementary section 3

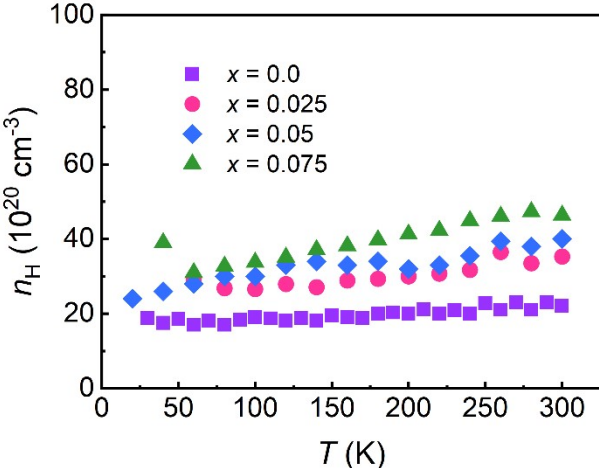

**Fig. S5** Hall carrier concentrations of  $\text{Ti}(\text{Fe}_{0.5+x}\text{Co}_{0.25}\text{Cu}_{0.25-x})\text{Sb}$  ( $x = 0, 0.025, 0.05,$  and  $0.075$ ) samples as a function of temperature. The almost temperature independent carrier concentration indicates a heavily doped semiconductor character of these samples.

## References

- 1 A. F. May, E. S. Toberer, A. Sarmat and G. J. Snyder, *Phys. Rev. B*, 2009, **80**, 125205.
- 2 C. Fu, T. Zhu, Y. Pei, H. Xie, H. Wang, G. J. Snyder, Y. Liu, Y. Liu and X. Zhao, *Adv. Energy Mater.*, 2014, **4**, 1400600.
- 3 D. G. Cahill, S. K. Watson and R. O. Pohl, *Phys. Rev. B*, 1992, **46**, 6131-6140.
- 4 J. Callaway, *Phys. Rev.*, 1959, **113**, 1046-1051.
- 5 J. Callaway and H. C. von Baeyer, *Phys. Rev.*, 1960, **120**, 1149-1154.
- 6 C. J. Glassbrenner and G. A. Slack, *Phys. Rev.*, 1964, **134**, A1058-A1069.
